# Supplementary material for: Occurrence of Pasteurella multocida in Dogs Being Trained for Animal-Assisted Therapy
Source: MDPI journal article supplement (doi:10.3390/ijerph17176385), 2020-09-02
Supplement: s1 [file s1]

### Health questionnaire and life habits of the dogs

Owner's Name: \_\_\_\_\_

Owner's e-mail \_\_\_\_\_

Dog's Name \_\_\_\_\_

**Please choose or indicates your responses:**

#### **Part 1 – Characteristics of the dog and life habits**

Age of the Dog            ☐ 3 - 12 months            ☐ > 12 months

Sex of the Dog            F ☐        M ☐            (neutered        yes ☐            no ☐)

Dog Breed \_\_\_\_\_

**1. Does your dog go outdoors or stay indoors?**

indoor ☐

outdoor ☐

**2. Does your dog ever go to dogs' gathering areas, public parks or any other places where dogs meet?**

Yes ☐ No ☐

#### **Part 2 – Medical history**

**3. Has your dog had a coprological examination for endoparasites in the last year?**

Yes ☐ No ☐

If yes, please list kind of parasites found: \_\_\_\_\_

If yes, please list type of treatment used: \_\_\_\_\_

**4. Have you found ectoparasites on your dog in the last year?**

Yes ☐ No ☐

If yes, please list ectopesticides you used: \_\_\_\_\_

**5. Have you found fungus and mites on your dog's skin in the last year?**

Yes ☐ No ☐

If yes, please list kind of fungus and mites found: \_\_\_\_\_

If yes, please list treatment used: \_\_\_\_\_

**6. Which vaccines does your pet usually receive?**

- Rabies ☐
- Distemper ☐
- Parvo ☐
- Leptospirosis ☐
- Bordetella ☐
- CAV-1 (canine adenovirus type 1) ☐

**7. Has your dog had an examination for *Ehrlichia* antibody titers in the last year?**

Yes ☐ No ☐

**8. Has your dog had an examination for *Leishmania* antibody titers in the last year?**

Yes ☐ No ☐

**9. Has your dog had a blood streak for Heartworm in the last year?**

Yes ☐ No ☐

**10 Please list/describe any previously diagnosed illnesses, chronic conditions, and past surgeries related to your dog:**

---

**11. Please describe any health concerns you may have at this time:**

---

**12. Please, indicates any recent or ongoing antibiotic treatment:**

---

Date: \_\_/\_\_/\_\_
